# Supplementary material for: Outcomes of Hospitalized COVID-19 Patients by Risk Factors: Results from a United States Hospital Claims Database
Source: PubMed Central journal article supplement (PMC7539762; doi:10.36469/jheor.2020.17331), 2020-09-29
Supplement: jheor-7-2-17331-s01.pdf [file jheor-7-2-17331-s01.pdf]

### Supplementary Online Material

Mallow PJ, Belk KW, Topmiller M, Hooker EA. Outcomes of hospitalized COVID-19 patients by risk factors: Results from a United States hospital claims database. *JHEOR*. 2020;7(2):165-174.  
doi:[10.36469/jheor.2020.17331](https://doi.org/10.36469/jheor.2020.17331)

**Table S1.** ICD-10 Codes Used to Identify Comorbid Conditions Contributing to Risk Factors

**Table S2.** Cholesterol/Hypertension Medications Administered at Hospital

**Table S3.** Mortality by Age Range and Risk Factors

**Table S4.** Hospital Treatments by Number of Risk Factors

**Table S5.** Association of Risk Factors with Mortality with Broad Renal Disease Definition, ICU Utilization, ICU Length of Stay, and Hospital Length of Stay: Complete Model data

This supplementary material has been provided by the authors to give readers additional information about their work.

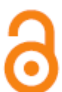

**Table S1. ICD-10 Codes Used to Identify Comorbid Conditions Contributing to Risk Factors**

|                                  |       |        |        |        |        |        |        |
|----------------------------------|-------|--------|--------|--------|--------|--------|--------|
| <i>Chronic Lung Disease</i>      |       |        |        |        |        |        |        |
| J40.x                            | J41.x | J42.x  | J43.x  | J44.x  | J45.x  | J46.x  | J47.x  |
| <i>Moderate-to Severe Asthma</i> |       |        |        |        |        |        |        |
| J45.4                            | J45.5 |        |        |        |        |        |        |
| <i>Heart Condition</i>           |       |        |        |        |        |        |        |
| I21.x                            | I22.x | I20.0x | I50.x  | I25.x  | I48.x  | E78.x  |        |
| <i>Immunocompromised</i>         |       |        |        |        |        |        |        |
| C00-D49.99                       | K58.x | M05.x  | M06.x  | L40.x  | M45.x  | B20.x  |        |
| <i>Obesity</i>                   |       |        |        |        |        |        |        |
| E66.01                           | E66.2 | Z68.35 | Z68.36 | Z68.37 | Z68.38 | Z68.39 | Z68.4x |
| <i>Diabetes</i>                  |       |        |        |        |        |        |        |
| E08.x                            | E09.x | E10.x  | E11.x  | E12.x  | E13.x  |        |        |
| <i>CKD with Dialysis</i>         |       |        |        |        |        |        |        |
| N18.5                            | N18.6 |        |        |        |        |        |        |
| <i>Liver Disease</i>             |       |        |        |        |        |        |        |
| K70.x                            | K71.x | K72.x  | K73.x  | K74.x  | K75.x  | K76.x  | K77.x  |
| <i>Hypertension</i>              |       |        |        |        |        |        |        |
| I10.x                            | I11.x | I12.x  | I13.x  | I14.x  | I15.x  | I6.x   |        |

**Table S2. Cholesterol/Hypertension Medications Administered at Hospital**

| <b>Statins</b> | <b>Statins (cont.)</b> | <b>Statins (cont.)</b> | <b>Statins (cont.)</b> | <b>ACE Inhibitors</b> | <b>ACE Inhibitors (cont.)</b> | <b>ACE Inhibitors (cont.)</b> | <b>ARBs</b> |
|----------------|------------------------|------------------------|------------------------|-----------------------|-------------------------------|-------------------------------|-------------|
| Advicor        | Ezallor                | pitavastatin           | Sinvalip               | Accupril              | Listril                       | Tritace                       | almesartan  |
| Alipza         | Flolipid               | Prasterol              | Sinvat                 | Aceon                 | Lopril                        | Univasc                       | atacand     |
| Alpheus        | fluvastatin            | Pravachol              | Sivastin               | Alacepril             | Lotensin                      | Vasotec                       | avapro      |
| Altocor        | Goltor                 | Pravaselect            | Sortis                 | Altace                | Mavik                         | Zefnopril                     | azilsartan  |
| Altoprev       | Inegy                  | pravastatin            | Staros                 | Arfalsin              | Moexipril                     | Zestril                       | benicar     |
| Aplactin       | Koleros                | Primesin               | Staticol               | Benazepril            | Monopril                      |                               | byvalson    |
| Arkas          | Krustat                | Provisacor             | Torvacard              | Berlipril             | Novatec                       |                               | candesartan |
| Atocor         | Lescol                 | Rosastin               | Torvast                | Capoten               | Odrik                         |                               | cozaar      |
| Ator           | Lipenil                | Rosim                  | Totalip                | Captopril             | Perindo                       |                               | diovan      |
| Atoris         | Lipertance             | Rosulip                | Triveram               | Cilazapril            | Perindopril                   |                               | edarbi      |
| Atorlip        | Lipex                  | Rosumibe               | Vastgen                | Coversyl              | Prilace                       |                               | entresto    |
| atorvastatin   | Lipidover              | rosuvastatin           | Vasticor               | Enalapril             | Prinivil                      |                               | eprosartan  |
| Baycol         | Lipitor                | Sanaprav               | Vastin                 | Enalapril             | Profarma                      |                               | irbesartan  |
| Caduet         | Liponorm               | Selectin               | Viazet                 | Enap                  | Qbrelis                       |                               | losartan    |
| Canef          | Lipostat               | Selektine              | Vytorin                | Epaned                | Quinapril                     |                               | micardis    |
| cerivastatin   | Livalo                 | Setorlin               | Xipocol                | Fosinopril            | Ramace                        |                               | prexxartan  |
| Cholecomb      | Livazo                 | Simbatrix              | Zestan                 | Fosinopril            | Ramipril                      |                               | telmisartan |
| Colcardiol     | lovastatin             | Simcard                | Zevistat               | Fositen               | ramipril                      |                               | tevetan     |
| Colfri         | Medipo                 | Simcor                 | Zocor                  | Gopten                | Ramitac                       |                               | valsartan   |
| Compactin      | Mevacor                | Simcora                | Zypitamag              | Imidapril             | Ramiwin                       |                               |             |
| Crestor        | Miastina               | Simestat               |                        | Inhibace              | Renitec                       |                               |             |
| Delipid        | Nikita                 | simvastatin            |                        | Lexxel                | Tanatril                      |                               |             |
| Dilivas        | Omistat                | Sincol                 |                        | Lisidigal             | Trandolapril                  |                               |             |
| Exorta         | Pitava                 | Sinvacor               |                        | Lisinopril            | Triatec                       |                               |             |

Abbreviations: ACE, angiotensin-converting enzyme; ARB, angiotensin II receptor blockers.

**Table S3. Mortality by Age Range and Risk Factors**

| Age   | Zero Risk Factors |           |                | One Risk Factor |           |                | Two Risk Factors |           |                | Three or More Risk Factors |           |                | P Value <sup>a</sup> |
|-------|-------------------|-----------|----------------|-----------------|-----------|----------------|------------------|-----------|----------------|----------------------------|-----------|----------------|----------------------|
|       | Pop.              | Mortality | Mortality Rate | Pop.            | Mortality | Mortality Rate | Pop.             | Mortality | Mortality Rate | Pop.                       | Mortality | Mortality Rate |                      |
| 0–19  | 69                | 0         | 0.0%           | 36              | 0         | 0.0%           | 11               | 1         | 9.1%           | 5                          | 0         | 0.0%           | 0.132                |
| 20–29 | 289               | 4         | 1.4%           | 175             | 3         | 1.7%           | 82               | 7         | 8.5%           | 42                         | 3         | 7.1%           | 0.002                |
| 30–39 | 511               | 8         | 1.6%           | 366             | 17        | 4.6%           | 224              | 17        | 7.6%           | 155                        | 15        | 9.7%           | <.001                |
| 40–49 | 529               | 14        | 2.6%           | 616             | 27        | 4.4%           | 517              | 44        | 8.5%           | 383                        | 72        | 18.8%          | <.001                |
| 50–59 | 599               | 35        | 5.8%           | 980             | 84        | 8.6%           | 1151             | 153       | 13.3%          | 810                        | 166       | 20.5%          | <.001                |
| 60–69 | 230               | 22        | 9.6%           | 816             | 100       | 12.3%          | 1456             | 241       | 16.6%          | 2242                       | 546       | 24.4%          | <.001                |
| 70–79 | 0                 | 0         | 0.0%           | 213             | 58        | 27.2%          | 1125             | 295       | 26.2%          | 3061                       | 991       | 32.4%          | <.001                |
| 80–89 | 0                 | 0         | 0.0%           | 154             | 68        | 44.2%          | 1188             | 443       | 37.3%          | 2183                       | 914       | 41.9%          | 0.022                |
| 90+   | 0                 | 0         | 0.0%           | 68              | 29        | 42.6%          | 678              | 245       | 36.1%          | 712                        | 313       | 44.0%          | 0.01                 |

<sup>a</sup>Comparing Risk Factors for Each Age Group groups for each age group

**Table S4. Hospital Treatments by Number of Risk Factors**

|                      | Zero Risk Factors |       | One Risk Factor |       | Two Risk Factors |       | Three or More Risk Factors |       |
|----------------------|-------------------|-------|-----------------|-------|------------------|-------|----------------------------|-------|
|                      | Count             | %     | Count           | %     | Count            | %     | Count                      | %     |
| Total                | 2885              | 10.5% | 4686            | 17.0% | 8442             | 30.7% | 11471                      | 41.7% |
| <b>Treatments</b>    |                   |       |                 |       |                  |       |                            |       |
| azithromycin         | 898               | 31.1% | 1539            | 32.8% | 2797             | 33.1% | 3912                       | 34.1% |
| enoxaparin           | 925               | 32.1% | 1517            | 32.4% | 2534             | 30.0% | 3099                       | 27.0% |
| hydroxychloroquine   | 721               | 25.0% | 1168            | 24.9% | 2210             | 26.2% | 3097                       | 27.0% |
| zinc                 | 341               | 11.8% | 462             | 9.9%  | 901              | 10.7% | 1363                       | 11.9% |
| methylprednisolone   | 95                | 3.3%  | 202             | 4.3%  | 426              | 5.0%  | 742                        | 6.5%  |
| apixaban             | 37                | 1.3%  | 93              | 2.0%  | 331              | 3.9%  | 735                        | 6.4%  |
| clopidogrel          | 2                 | 0.1%  | 36              | 0.8%  | 249              | 2.9%  | 561                        | 4.9%  |
| alteplase            | 22                | 0.8%  | 74              | 1.6%  | 171              | 2.0%  | 319                        | 2.8%  |
| tocilizumab          | 98                | 3.4%  | 145             | 3.1%  | 256              | 3.0%  | 313                        | 2.7%  |
| nifedipine           | 5                 | 0.2%  | 33              | 0.7%  | 89               | 1.1%  | 205                        | 1.8%  |
| acetazolamide        | 10                | 0.3%  | 36              | 0.8%  | 73               | 0.9%  | 127                        | 1.1%  |
| rivaroxaban          | 11                | 0.4%  | 36              | 0.8%  | 104              | 1.2%  | 104                        | 0.9%  |
| ritonavir            | 3                 | 0.1%  | 11              | 0.2%  | 19               | 0.2%  | 28                         | 0.2%  |
| remdesivir           | 15                | 0.5%  | 24              | 0.5%  | 30               | 0.4%  | 28                         | 0.2%  |
| argatroban           | 1                 | 0.0%  | 6               | 0.1%  | 13               | 0.2%  | 27                         | 0.2%  |
| lopinavir ritonavir  | 2                 | 0.1%  | 8               | 0.2%  | 16               | 0.2%  | 24                         | 0.2%  |
| cyclosporine         | 0                 | 0.0%  | 3               | 0.1%  | 9                | 0.1%  | 20                         | 0.2%  |
| darunavir            | 3                 | 0.1%  | 12              | 0.3%  | 11               | 0.1%  | 17                         | 0.1%  |
| Ivermectin           | 3                 | 0.1%  | 9               | 0.2%  | 16               | 0.2%  | 17                         | 0.1%  |
| dabigatran           | 1                 | 0.0%  | 2               | 0.0%  | 7                | 0.1%  | 16                         | 0.1%  |
| fondaparinux         | 2                 | 0.1%  | 3               | 0.1%  | 13               | 0.2%  | 15                         | 0.1%  |
| tranexamic acid      | 8                 | 0.3%  | 2               | 0.0%  | 7                | 0.1%  | 15                         | 0.1%  |
| bivalirudin          | 1                 | 0.0%  | 2               | 0.0%  | 2                | 0.0%  | 10                         | 0.1%  |
| darunavir cobicistat | 1                 | 0.0%  | 7               | 0.1%  | 3                | 0.0%  | 9                          | 0.1%  |
| chloroquine          | 0                 | 0.0%  | 0               | 0.0%  | 0                | 0.0%  | 3                          | 0.0%  |
| atazanavir           | 1                 | 0.0%  | 0               | 0.0%  | 5                | 0.1%  | 3                          | 0.0%  |
| canagliflozin        | 0                 | 0.0%  | 0               | 0.0%  | 1                | 0.0%  | 3                          | 0.0%  |
| nitazoxanide         | 3                 | 0.1%  | 2               | 0.0%  | 2                | 0.0%  | 3                          | 0.0%  |
| ddoxaban             | 0                 | 0.0%  | 0               | 0.0%  | 0                | 0.0%  | 1                          | 0.0%  |
| fosamprenavir        | 0                 | 0.0%  | 0               | 0.0%  | 0                | 0.0%  | 1                          | 0.0%  |
| tenecteplase         | 0                 | 0.0%  | 1               | 0.0%  | 2                | 0.0%  | 1                          | 0.0%  |

**Table S5. Association of Risk Factors with Mortality with Broad Renal Disease Definition, ICU Utilization, ICU Length of Stay, and Hospital Length of Stay: Complete Model data**

| <b>Mortality w/ Broad Renal Disease Definition</b> | <b>Odds Ratio</b> | <b>95% Confidence Interval</b> |      | <b>P Value</b> |
|----------------------------------------------------|-------------------|--------------------------------|------|----------------|
| <b>CDC Risk Factor Cohorts</b>                     |                   |                                |      |                |
| 0                                                  | Reference         |                                |      |                |
| 1                                                  | 2.16              | 1.66                           | 2.80 | <0.001         |
| 2                                                  | 2.76              | 2.10                           | 3.64 | <0.001         |
| 3 or More Risk Factors                             | 3.68              | 2.68                           | 5.06 | <0.001         |
| <b>Age</b>                                         | 1.02              | 1.01                           | 1.02 | <0.001         |
| <b>Gender</b>                                      |                   |                                |      |                |
| Female                                             | Reference         |                                |      |                |
| Male                                               | 1.58              | 1.47                           | 1.71 | <0.001         |
| <b>Insurance</b>                                   |                   |                                |      |                |
| Medicaid as Any Payer                              | 1.10              | 1.01                           | 1.20 | 0.036          |
| <b>Teaching Status</b>                             |                   |                                |      |                |
| Nonteaching Hospital                               | Reference         |                                |      |                |
| Teaching Hospital                                  | 0.90              | 0.82                           | 0.99 | 0.026          |
| <b>Hospital Bed Size</b>                           |                   |                                |      |                |
| 0–99                                               | Reference         |                                |      |                |
| 100–199                                            | 1.75              | 1.36                           | 2.26 | <0.001         |
| 200–299                                            | 1.78              | 1.39                           | 2.30 | <0.001         |
| 300–499                                            | 2.24              | 1.74                           | 2.88 | <0.001         |
| 500 or More                                        | 2.26              | 1.76                           | 2.91 | <0.001         |
| <b>Comorbid Risk Factors</b>                       |                   |                                |      |                |
| Chronic Lung Disease                               | 0.87              | 0.78                           | 0.96 | 0.007          |
| Moderate-to-Severe Asthma                          | 1.11              | 0.60                           | 2.05 | 0.747          |
| Heart Condition                                    | 1.24              | 1.13                           | 1.36 | <0.001         |
| Immunocompromised                                  | 0.87              | 0.76                           | 0.99 | 0.035          |
| Obesity                                            | 1.26              | 1.11                           | 1.42 | <0.001         |
| Diabetes                                           | 1.24              | 1.12                           | 1.37 | <0.001         |
| Renal Disease                                      | 1.56              | 1.43                           | 1.70 | <0.001         |
| Liver Disease                                      | 1.91              | 1.61                           | 2.26 | <0.001         |
| Hypertension                                       | 0.74              | 0.66                           | 0.82 | <0.001         |
| DNR                                                | 8.90              | 8.17                           | 9.70 | <0.001         |
| Statin Use in Hospital                             | 0.54              | 0.49                           | 0.59 | <0.001         |
| <b>ICU Utilization</b>                             |                   |                                |      |                |
| <b>CDC Risk Factor Cohorts</b>                     |                   |                                |      |                |
| 0                                                  | Reference         |                                |      |                |
| 1                                                  | 1.68              | 1.44                           | 1.97 | <0.001         |
| 2                                                  | 1.80              | 1.50                           | 2.16 | <0.001         |
| 3 or More Risk Factors                             | 2.18              | 1.72                           | 2.76 | <0.001         |
| <b>Age</b>                                         | 0.98              | 0.98                           | 0.99 | <0.001         |

**Table S5. Association of Risk Factors with Mortality with Broad Renal Disease Definition, ICU Utilization, ICU Length of Stay, and Hospital Length of Stay: Complete Model data**

| <b>Gender</b>                  |            |                                |      |                |
|--------------------------------|------------|--------------------------------|------|----------------|
| Female                         | Reference  |                                |      |                |
| Male                           | 1.31       | 1.22                           | 1.40 | <0.001         |
| <b>Insurance</b>               |            |                                |      |                |
| Medicaid as Any Payer          | 0.76       | 0.70                           | 0.82 | <0.001         |
| <b>Teaching Status</b>         |            |                                |      |                |
| Nonteaching Hospital           | Reference  |                                |      |                |
| Teaching Hospital              | 0.42       | 0.39                           | 0.45 | <0.001         |
| <b>Hospital Bed Size</b>       |            |                                |      |                |
| 0–99                           | Reference  |                                |      |                |
| 100–199                        | 0.92       | 0.78                           | 1.10 | 0.365          |
| 200–299                        | 1.01       | 0.85                           | 1.19 | 0.909          |
| 300–499                        | 1.36       | 1.15                           | 1.60 | <0.001         |
| 500 or More                    | 0.82       | 0.69                           | 0.97 | 0.019          |
| <b>Comorbid Risk Factors</b>   |            |                                |      |                |
| Chronic Lung Disease           | 0.88       | 0.80                           | 0.96 | 0.006          |
| Moderate-to-Severe Asthma      | 0.97       | 0.60                           | 1.55 | 0.885          |
| Heart Condition                | 1.13       | 1.04                           | 1.23 | 0.004          |
| Immunocompromised              | 0.88       | 0.78                           | 1.00 | 0.046          |
| Obesity                        | 1.37       | 1.23                           | 1.52 | <0.001         |
| Diabetes                       | 1.09       | 1.00                           | 1.20 | 0.056          |
| Renal Disease                  | 0.95       | 0.82                           | 1.10 | 0.505          |
| Liver Disease                  | 1.67       | 1.44                           | 1.94 | <0.001         |
| Hypertension                   | 0.85       | 0.77                           | 0.93 | <0.001         |
| DNR                            | 1.97       | 1.82                           | 2.15 | <0.001         |
| Statin Use in Hospital         | 1.53       | 1.41                           | 1.65 | <0.001         |
| <b>ICU Length of stay</b>      | <b>IRR</b> | <b>95% Confidence Interval</b> |      | <b>P Value</b> |
| <b>CDC Risk Factor Cohorts</b> |            |                                |      |                |
| 0                              | Reference  |                                |      |                |
| 1                              | 1.15       | 1.03                           | 1.28 | 0.016          |
| 2                              | 1.29       | 1.14                           | 1.46 | <0.001         |
| 3 or More Risk Factors         | 1.34       | 1.14                           | 1.58 | <0.001         |
| <b>Age</b>                     | 1.00       | 0.99                           | 1.00 | <0.001         |
| <b>Gender</b>                  |            |                                |      |                |
| Female                         | Reference  |                                |      |                |
| Male                           | 1.09       | 1.04                           | 1.14 | <0.001         |
| <b>Insurance</b>               |            |                                |      |                |
| Medicaid as Any Payer          | 0.89       | 0.84                           | 0.94 | <0.001         |
| <b>Teaching Status</b>         |            |                                |      |                |
| Nonteaching Hospital           | Reference  |                                |      |                |
| Teaching Hospital              | 0.98       | 0.93                           | 1.03 | 0.426          |

**Table S5. Association of Risk Factors with Mortality with Broad Renal Disease Definition, ICU Utilization, ICU Length of Stay, and Hospital Length of Stay: Complete Model data**

| <b>Hospital Bed Size</b>       |            |                                |      |                |
|--------------------------------|------------|--------------------------------|------|----------------|
| 0–99                           | Reference  |                                |      |                |
| 100–199                        | 1.04       | 0.93                           | 1.16 | 0.503          |
| 200–299                        | 1.02       | 0.91                           | 1.13 | 0.78           |
| 300–499                        | 1.04       | 0.93                           | 1.16 | 0.458          |
| 500 or More                    | 1.07       | 0.95                           | 1.19 | 0.251          |
| <b>Comorbid Risk Factors</b>   |            |                                |      |                |
| Chronic Lung Disease           | 0.93       | 0.87                           | 0.99 | 0.016          |
| Moderate-to-Severe Asthma      | 1.02       | 0.74                           | 1.41 | 0.882          |
| Heart Condition                | 1.02       | 0.96                           | 1.08 | 0.508          |
| Immunocompromised              | 0.93       | 0.85                           | 1.01 | 0.082          |
| Obesity                        | 1.14       | 1.06                           | 1.22 | <0.001         |
| Diabetes                       | 0.92       | 0.86                           | 0.98 | 0.006          |
| Renal Disease                  | 0.94       | 0.85                           | 1.04 | 0.268          |
| Liver Disease                  | 1.09       | 0.99                           | 1.20 | 0.074          |
| Hypertension                   | 1.01       | 0.95                           | 1.08 | 0.698          |
| DNR                            | 1.01       | 0.95                           | 1.07 | 0.798          |
| Statin Use in Hospital         | 1.17       | 1.11                           | 1.23 | <0.001         |
| Mortality                      | 1.09       | 1.03                           | 1.15 | 0.002          |
| <b>Hospital Length of Stay</b> | <b>IRR</b> | <b>95% Confidence Interval</b> |      | <b>P Value</b> |
| <b>CDC Risk Factor Cohorts</b> |            |                                |      |                |
| 0                              | Reference  |                                |      |                |
| 1                              | 1.16       | 1.12                           | 1.21 | <0.001         |
| 2                              | 1.26       | 1.20                           | 1.33 | <0.001         |
| 3 or More Risk Factors         | 1.35       | 1.26                           | 1.44 | <0.001         |
| <b>Age</b>                     | 1.00       | 1.00                           | 1.00 | 0.546          |
| <b>Gender</b>                  |            |                                |      |                |
| Female                         | Reference  |                                |      |                |
| Male                           | 1.10       | 1.08                           | 1.13 | <0.001         |
| <b>Insurance</b>               |            |                                |      |                |
| Medicaid as Any Payer          | 0.98       | 0.96                           | 1.00 | 0.028          |
| <b>Teaching Status</b>         |            |                                |      |                |
| Nonteaching Hospital           | Reference  |                                |      |                |
| Teaching Hospital              | 0.93       | 0.92                           | 0.95 | <0.001         |
| <b>Hospital Bed Size</b>       |            |                                |      |                |
| 0–99                           | Reference  |                                |      |                |
| 100–199                        | 1.00       | 0.95                           | 1.05 | 0.864          |
| 200–299                        | 1.03       | 0.98                           | 1.09 | 0.245          |
| 300–499                        | 1.14       | 1.08                           | 1.20 | <0.001         |
| 500 or More                    | 1.13       | 1.07                           | 1.19 | <0.001         |
| <b>Comorbid Risk Factors</b>   |            |                                |      |                |



**Table S5. Association of Risk Factors with Mortality with Broad Renal Disease Definition, ICU Utilization, ICU Length of Stay, and Hospital Length of Stay: Complete Model data**

|                           |      |      |      |        |
|---------------------------|------|------|------|--------|
| Chronic Lung Disease      | 0.96 | 0.93 | 0.98 | 0.001  |
| Moderate-to-Severe Asthma | 1.10 | 0.96 | 1.25 | 0.162  |
| Heart Condition           | 1.01 | 0.99 | 1.04 | 0.225  |
| Immunocompromised         | 1.04 | 1.00 | 1.07 | 0.03   |
| Obesity                   | 1.15 | 1.12 | 1.19 | <0.001 |
| Diabetes                  | 0.98 | 0.96 | 1.01 | 0.131  |
| Renal Disease             | 1.10 | 1.06 | 1.14 | <0.001 |
| Liver Disease             | 1.12 | 1.07 | 1.18 | <0.001 |
| Hypertension              | 1.00 | 0.97 | 1.02 | 0.775  |
| DNR                       | 1.03 | 1.00 | 1.05 | 0.034  |
| Statin Use in Hospital    | 1.14 | 1.11 | 1.16 | <0.001 |
| Mortality                 | 1.00 | 0.98 | 1.03 | 0.875  |
